# Supplementary material
Source: publisher figshare collection journal article supplement (https://acs.figshare.com/ndownloader/files/4009633)
Supplement: Supplementary file 1 [file 4009633]

Compound	Smiles	Ki A3AR, nM
7	O[C@@H]1[C@H](O)[C@@]2(C(NC)=O)[C@H](C2)[C@H]1N(C=N3)C4=C3C(NCC5=CC(Cl)=CC=C5)=NC(C#CC6=CC=CC=C6)=N4	1.34 ± 0.30
8	O[C@@H]1[C@H](O)[C@@]2(C(NC)=O)[C@H](C2)[C@H]1N(C=N3)C4=C3C(NCC5=CC(Cl)=CC=C5)=NC(C#CC6=CC=C(F)C(F)=C6)=N4	3.49 ± 1.84
9	O[C@@H]1[C@H](O)[C@@]2(C(NC)=O)[C@H](C2)[C@H]1N(C=N3)C4=C3C(NC)=NC(C#CC5=CC=CC=C5)=N4	0.85 ± 0.22
10	O[C@@H]1[C@H](O)[C@@]2(C(NC)=O)[C@H](C2)[C@H]1N(C=N3)C4=C3C(NC)=NC(C#CC5=CC=C(Cl)S5)=N4	0.70 ± 0.11
11b	O[C@@H]1[C@H](O)[C@@]2(C(NC)=O)[C@H](C2)[C@H]1N(C=N3)C4=C3C(/C=C(O)/C5=CC=CC=C5)=NC(Cl)=N4	1140 ± 170
12	O[C@@H]1[C@H](O)[C@@]2(C(NC)=O)[C@H](C2)[C@H]1N(C=N3)C4=C3C(/C=C(O)/C5=CC=CC=C5)=NC(C#CC6=CC=CC=C6)=N4	78.5 ± 19.8
13	O[C@@H]1[C@H](O)[C@@]2(C(NC)=O)[C@H](C2)[C@H]1N(C=N3)C4=C3C(/C=C(O)/C5=C(Cl)C=CC=C5)=NC(C#CC6=CC=CC=C6Cl)=N4	515 ± 107
14	O[C@@H]1[C@H](O)[C@@]2(C(NC)=O)[C@H](C2)[C@H]1N(C=N3)C4=C3C(/C=C(O)/C5=CC=C(C(C)(C)C)C=C5)=NC(C#CC6=CC=C(C(C)(C)C)C=C6)=N4	94.3 ± 30.9
15	O[C@@H]1[C@H](O)[C@@]2(C(NC)=O)[C@H](C2)[C@H]1N(C=N3)C4=C3C(C)=NC(C#CC5=CC=CC=C5)=N4	6.01 ± 1.60
16	O[C@@H]1[C@H](O)[C@@]2(C(NC)=O)[C@H](C2)[C@H]1N(C=N3)C4=C3C(C)=NC(C#CC5=CC=C(F)C(F)=C5)=N4	98.5 ± 32.5
17	O[C@@H]1[C@H](O)[C@@]2(C(NC)=O)[C@H](C2)[C@H]1N(C=N3)C4=C3C(C)=NC(C#CC5=CC=C(C(C)(C)C)C=C5)=N4	305 ± 39
18	O[C@@H]1[C@H](O)[C@@]2(C(NC)=O)[C@H](C2)[C@H]1N(C=N3)C4=C3C(C)=NC(C#CC5=CN=CC=N5)=N4	343 ± 127
19	O[C@@H]1[C@H](O)[C@@]2(C(NC)=O)[C@H](C2)[C@H]1N(C=N3)C4=C3C(C)=NC(C#CC5=CC=C(Cl)S5)=N4	42.2 ± 17.3
20	O[C@@H]1[C@H](O)[C@@]2(C(NC)=O)[C@H](C2)[C@H]1N(C=N3)C4=C3C=NC(C#CC5=CC=C(F)C(F)=C5)=N4	124 ± 23
21	O[C@@H]1[C@H](O)[C@@]2(C(NC)=O)[C@H](C2)[C@H]1N(C=N3)C4=C3C=NC(C#CC5=CC=C(Cl)S5)=N4	60 ± 19
22	O[C@@H]1[C@H](O)[C@@]2(C(NC)=O)[C@H](C2)[C@H]1N(C=N3)C4=C3C(OC)=NC(C#CC5=CC=C(Cl)S5)=N4	684 ± 285
23	O[C@@H]1[C@H](O)[C@@]2(C(NC)=O)[C@H](C2)[C@H]1N(C=N3)C4=C3C=NC(NC)=N4	604 ± 261
24	O[C@@H]1[C@H](O)[C@@]2(C(NC)=O)[C@H](C2)[C@H]1N(C=N3)C4=C3C=NC(/C=C(O)/C5=CN=CC=N5)=N4	1480 ± 560
